# Supplementary material for: Electric Fields Enhance Ice Formation from Water Vapor by Decreasing the Nucleation Energy Barrier
Source: MDPI journal article supplement (doi:10.3390/colloids6010013), 2022-02-09
Supplement: s1 [file s1]

Archive with 10 entries (10 files):
- Video S8 for Colloids and Interfaces  after round 2.mp4
- Video S9 for Colloids and Interfaces after round 2.mp4
- Supplementary Material for Colloids and Interfaces after round 2.pdf
- Video S1 for Colloids And Interfaces after round 2.mp4
- Video S2 for Colloids and Interfaces  after round 2.mp4
- Video S3 for Colloids and Interfaces  after round 2.mp4
- Video S4 for Colloids And Interfaces  after round 2.mp4
- Video S5 for Colloids and Interfaces  after round 2.mp4
- Video S6 for Colloids and Interfaces  after round 2.mp4
- Video S7 for Colloids and Interfaces  after round 2.mp4
